# Supplementary material for: Revolutionizing fuel production through biologically synthesized zero-dimensional nanoparticles
Source: Royal Society of Chemistry journal article supplement (doi:10.1039/d3na00268c), 2023-01-01

## SUPPLEMENTARY MATERIAL

### Table of Content

| Sr. No. | Contents                                                                                          | Page No. |
|---------|---------------------------------------------------------------------------------------------------|----------|
| 1.      | Figure S1 Particle size distribution of the composite.                                            | 2        |
| 2.      | Figure S2 IFFT images of the composite.                                                           | 2        |
| 3.      | Figure S3 IFFT images of CQDs.                                                                    | 3        |
| 4.      | Figure S4 The surface area plot of the composite.                                                 | 3        |
| 5.      | Figure S5 DSC analysis of the composite.                                                          | 4        |
| 6.      | Figure S6 Bar graph representation of variation of dye concentration with decay rate.             | 4        |
| 7.      | Figure S7 Representing the effect of light intensity on the decay rate.                           | 5        |
| 8.      | Figure S8 Test of different scavengers on decay rate.                                             | 5        |
| 9.      | Figure S9 Kinetic study of the decay of CR.                                                       | 6        |
| 10.     | Figure S10 GCMS Spectra of Degraded Dye Products.                                                 | 7        |
| 11.     | Table S1: Details of dyes including structure, CI number, and M.W.                                | 8        |
| 12.     | Table S2: Various bounds of water specimen evaluated before and after photocatalytic decay of TB. | 9        |
| 13.     | Table S3: Various bounds of water specimen evaluated before and after photocatalytic decay of CR. | 10       |
| 14.     | Scheme S1: Mechanism trail of TB's decay via GCMS examination.                                    | 11       |

**Figure S1** Particle size distribution of the composite.

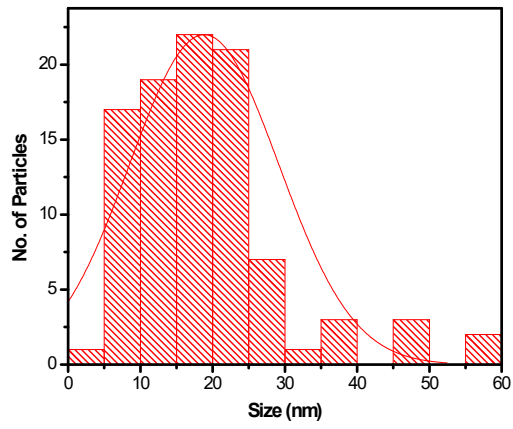

**Figure S2** IFFT images of the composite.

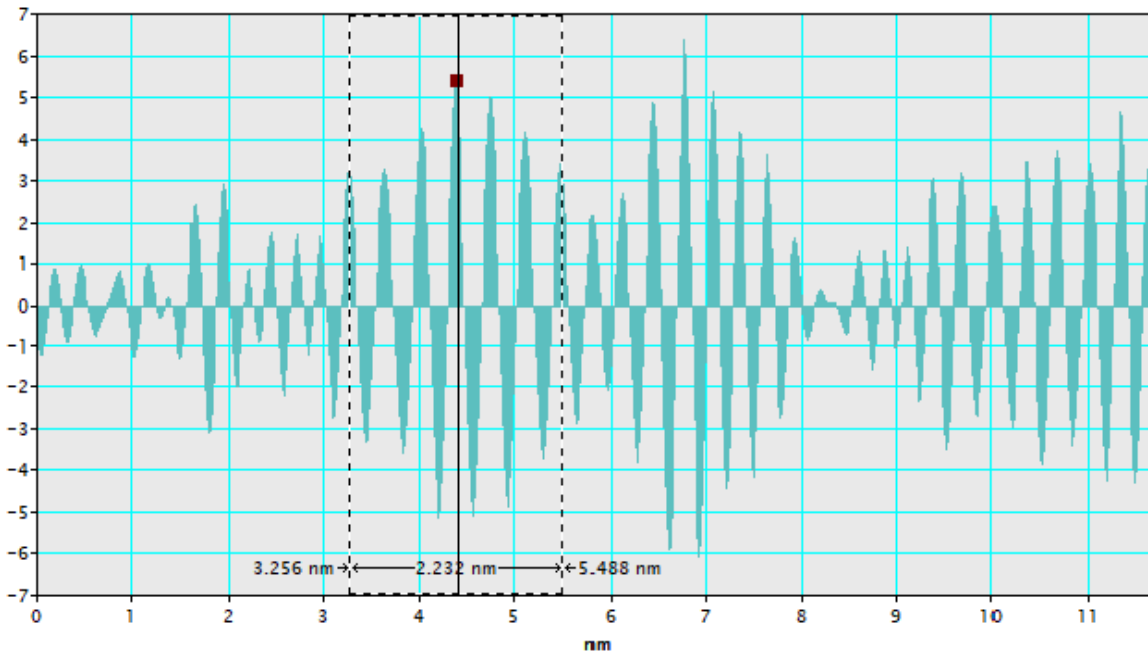

**Figure S3** IFFT images of CQDs.

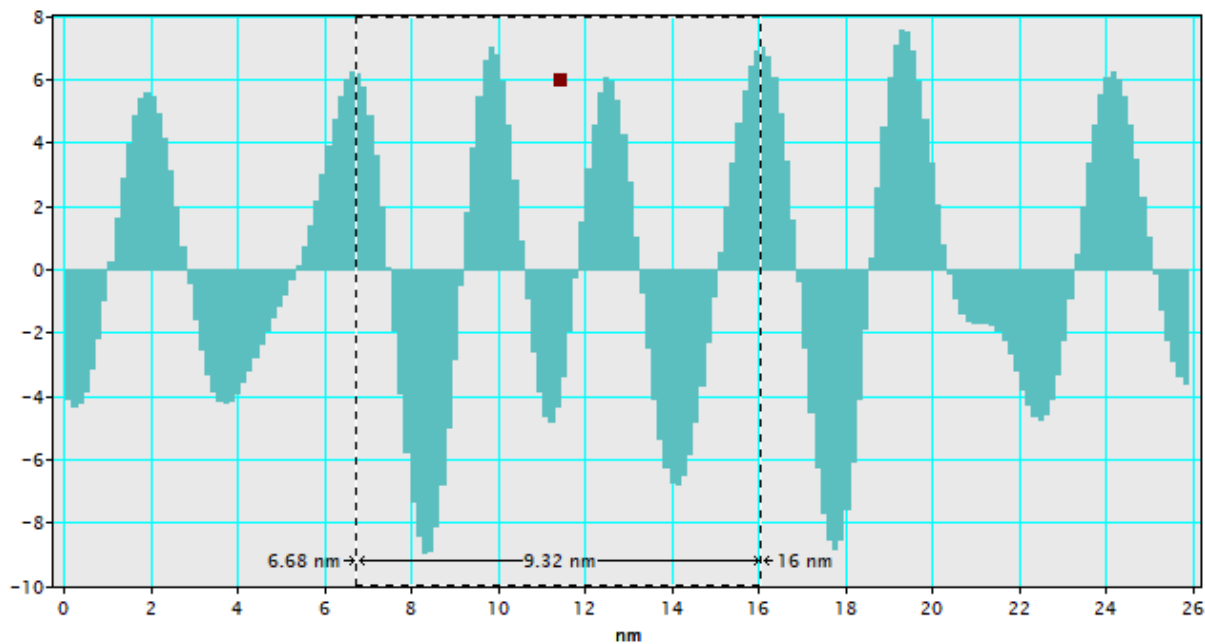

**Figure S4** The surface area plot of the composite

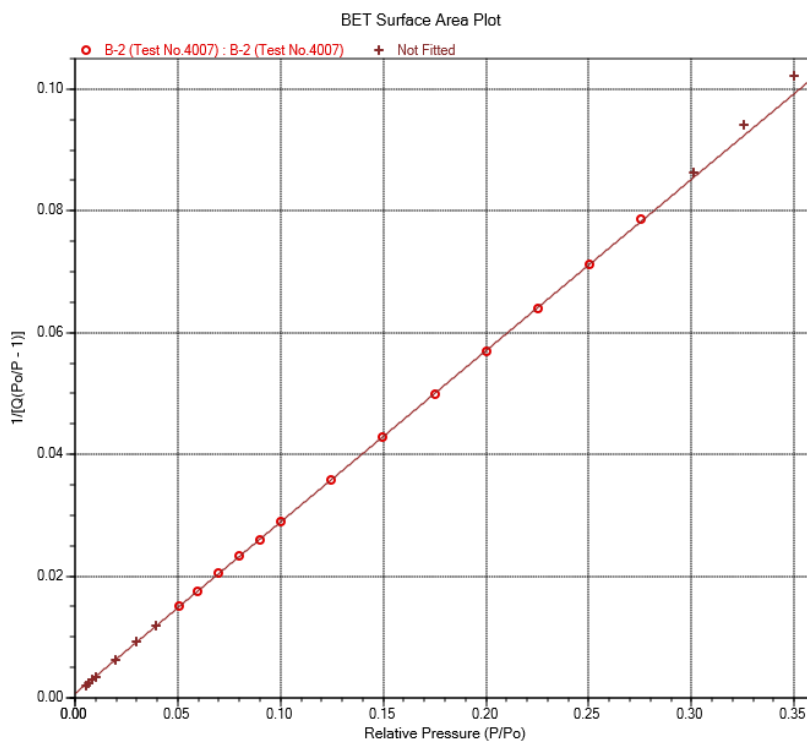

**Figure S5** DSC analysis of the composite

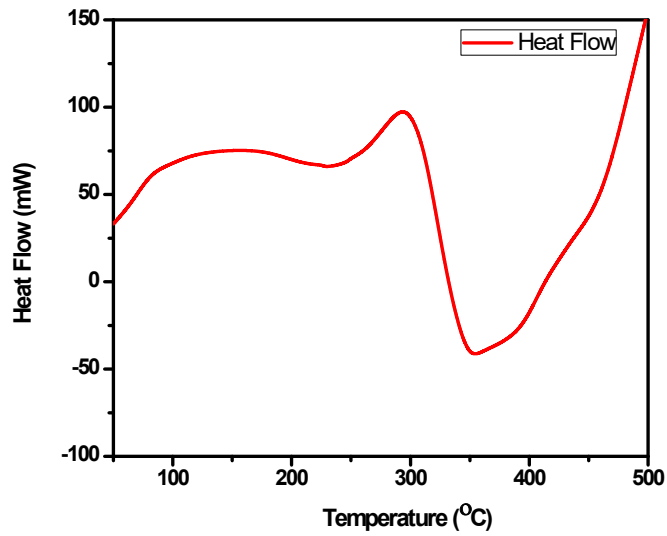

**Figure S6** Bar graph representation of variation of dye concentration with decay rate.

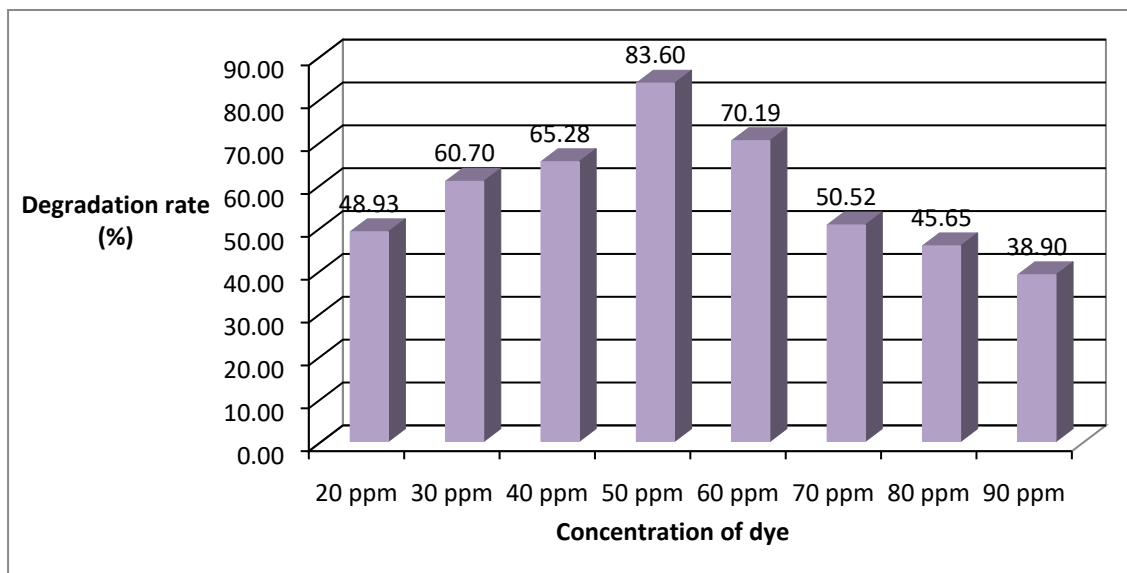

Figure S7 Representing the effect of light intensity on the decay rate.

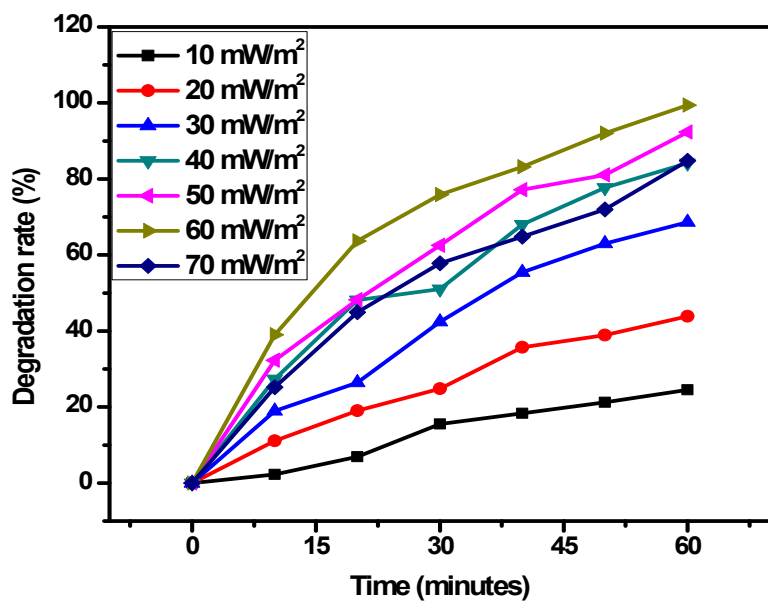

Figure S8 Test of different scavengers on decay rate.

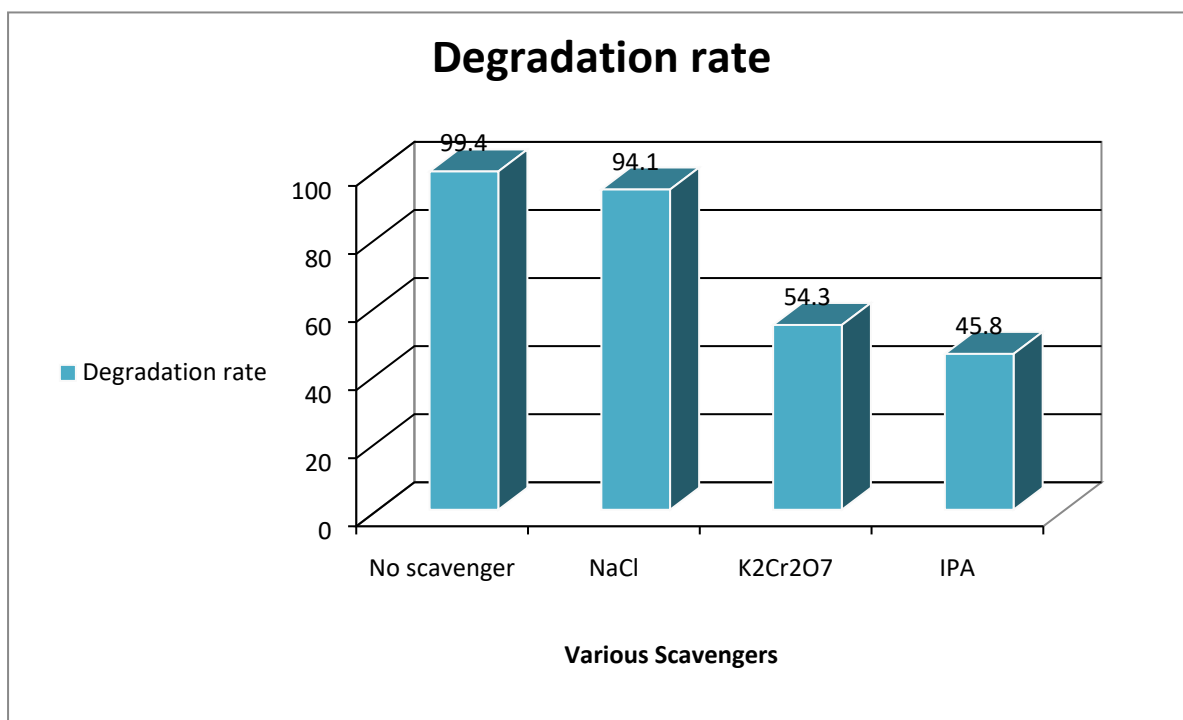

Figure S9 Kinetic study of the decay of CR.

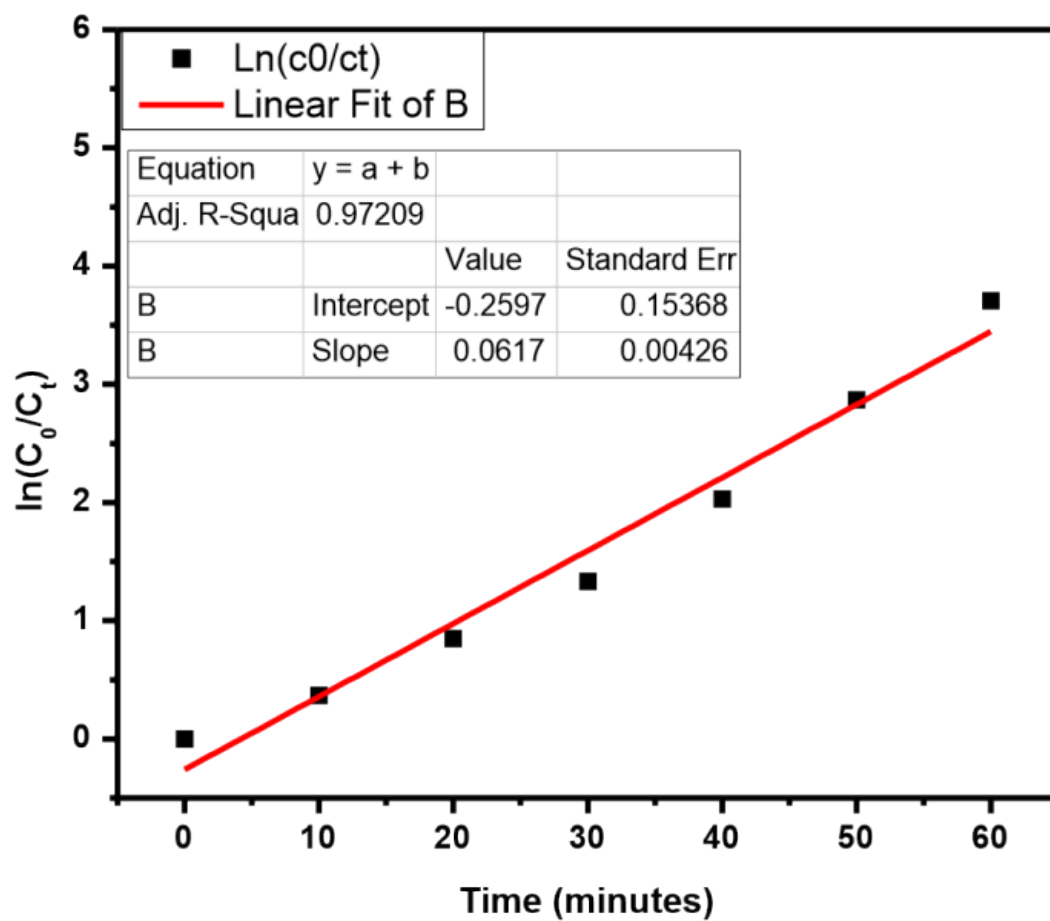

**Figure S10** GCMS Spectra of Degraded Dye Products.

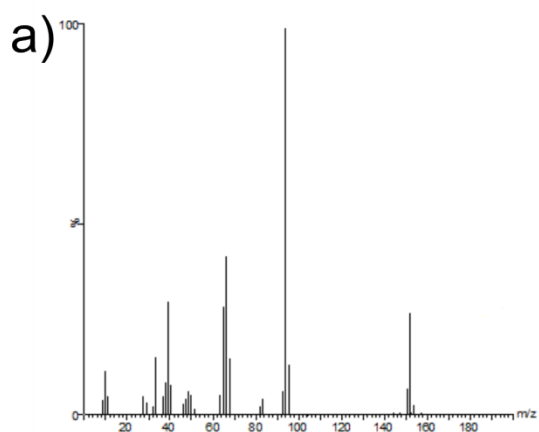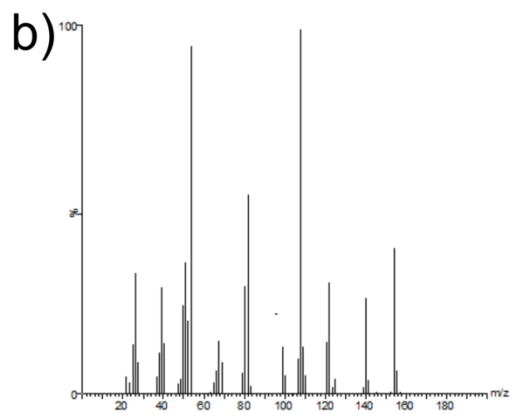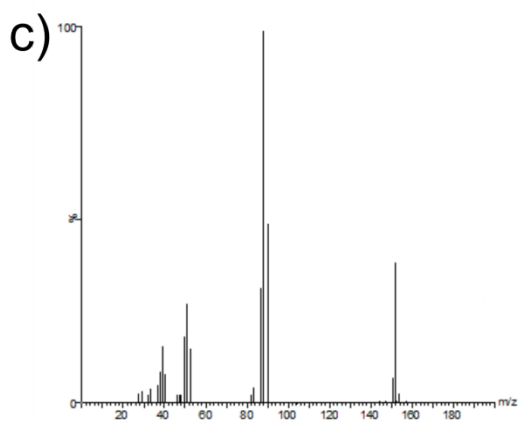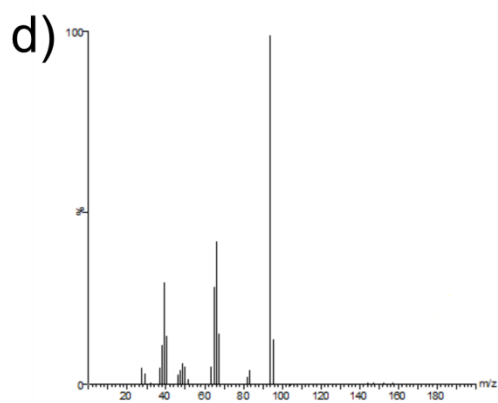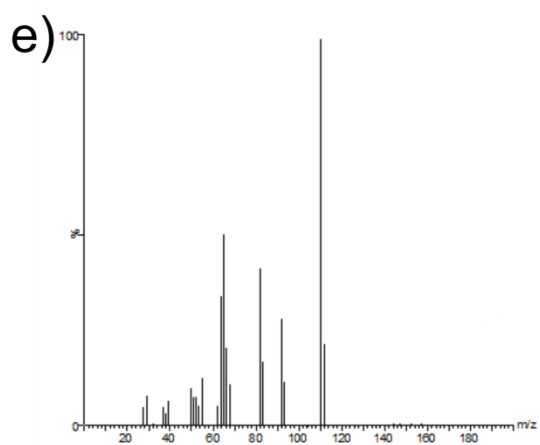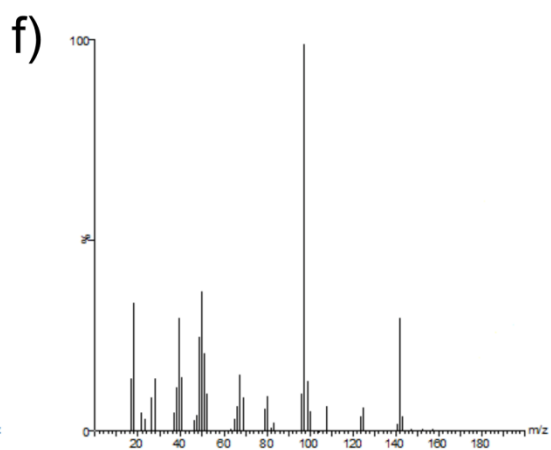

**Table S1: Details of dyes including structure, CI number, and M.W.**

| Sr. No. | Dye         | Dye structure                                                                      | Molecular Formula           | M.W. g/mol   | The Wavelength of Maximum absorbance ( $\lambda_{\max}$ ) | Procured from | CI No. |
|---------|-------------|------------------------------------------------------------------------------------|-----------------------------|--------------|-----------------------------------------------------------|---------------|--------|
| 1.      | Thymol Blue | 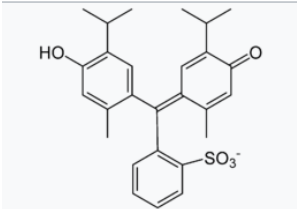  | $C_{27}H_{30}O_5S$          | 466.59 g/mol | 595 nm                                                    | Himedia       | 51010  |
| 2.      | Congo Red   |  | $C_{32}H_{22}Na_2N_6O_6S_2$ | 696.66 g/mol | 497 nm                                                    | Himedia       | 22120  |



**Table S2: Various bounds of water specimen evaluated before and after photocatalytic decay of TB.**

| <b>Bounds</b>          | <b>Prior decay</b> | <b>After photocatalytic decay</b> |
|------------------------|--------------------|-----------------------------------|
| pH                     | 5.5                | 6.9                               |
| DO (ppm)               | 0.3                | 7.5                               |
| Salinity (ppt)         | 0.07               | 0.89                              |
| TDS (ppm)              | 39.8               | 282                               |
| Conductance ( $\mu$ S) | 78                 | 512                               |
| COD (mg/L)             | 495                | 47.8                              |

**Table S3: Various bounds of water specimen evaluated before and after photocatalytic decay of CR.**

| <b>Bounds</b>          | <b>Prior decay</b> | <b>After photocatalytic decay</b> |
|------------------------|--------------------|-----------------------------------|
| pH                     | 6.5                | 7.2                               |
| DO (ppm)               | 0.2                | 7.4                               |
| Salinity (ppt)         | 0.08               | 0.86                              |
| TDS (ppm)              | 48.3               | 276                               |
| Conductance ( $\mu$ S) | 83                 | 509                               |
| COD (mg/L)             | 432                | 38.8                              |

**Scheme S1: Mechanism trail of TB's decay via GCMS examination.**

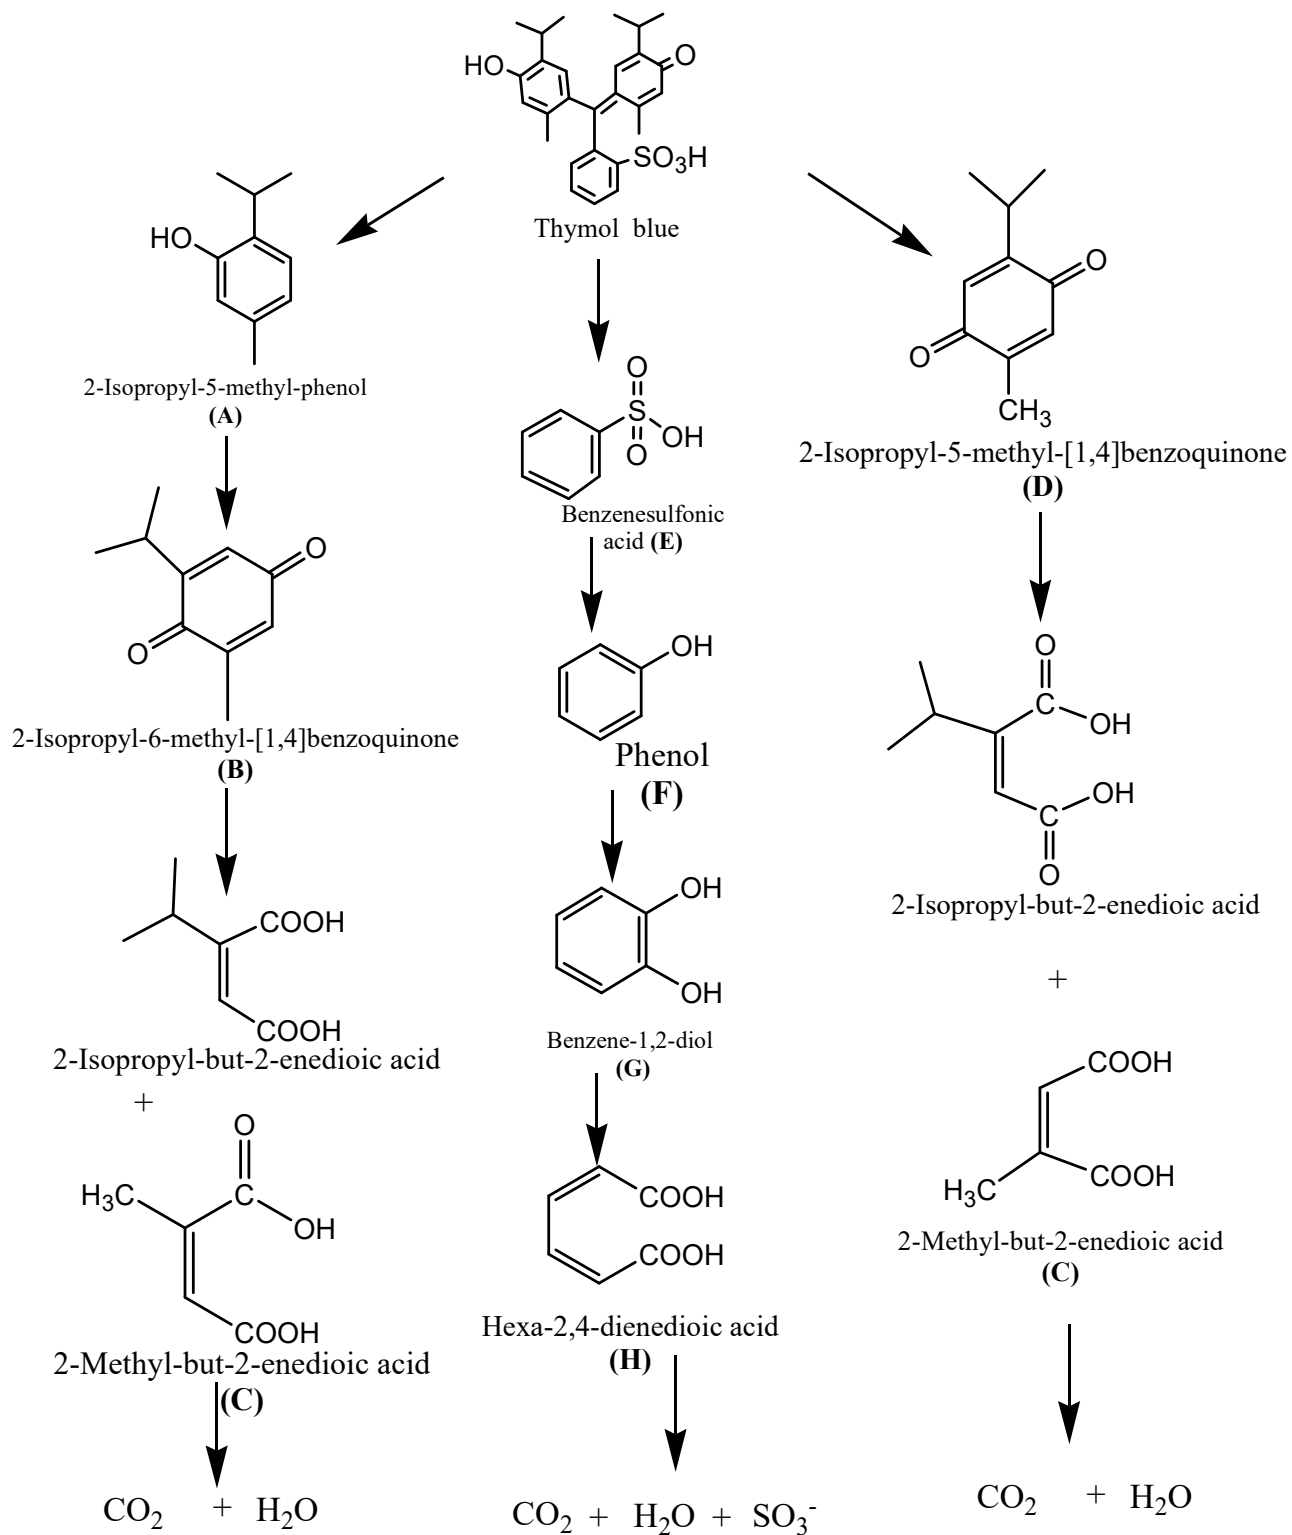

Supplement: d3na00268c1.pdf [file d3na00268c1.pdf]
